# Supplementary material
Source: publisher site journal article supplement (https://www.e-cmh.org/upload/media/cmh-2020-0012-suppl3.pdf)
Supplement: Supplementary file 1 [file cmh-2020-0012-suppl3.pdf]

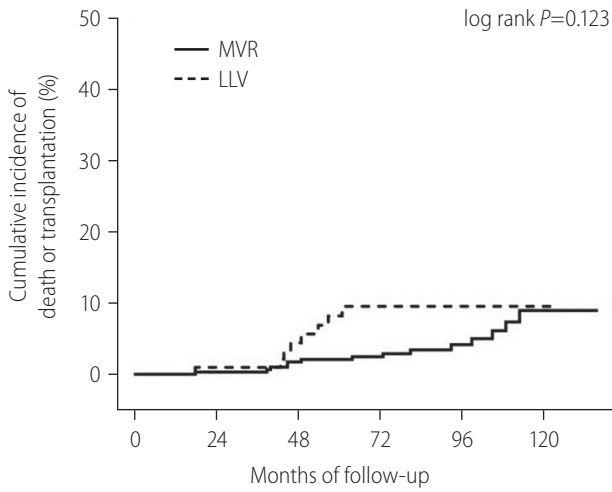

Number at risk

**A**

|     |     |     |     |     |     |    |
|-----|-----|-----|-----|-----|-----|----|
| MVR | 330 | 311 | 272 | 224 | 119 | 31 |
| LLV | 110 | 98  | 79  | 57  | 33  | 5  |

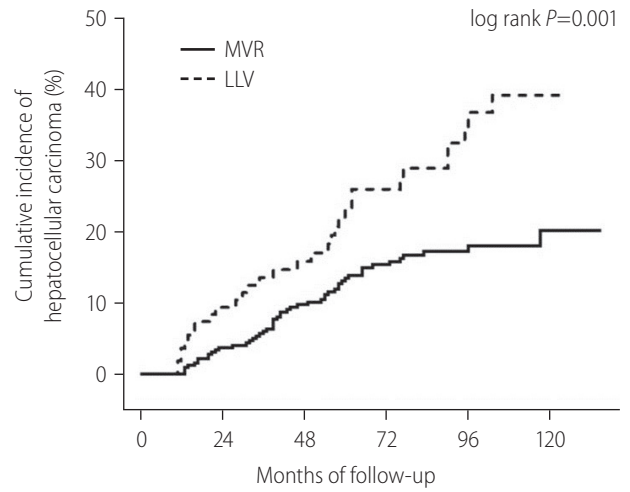

Number at risk

**B**

|     |     |     |     |     |     |    |
|-----|-----|-----|-----|-----|-----|----|
| MVR | 330 | 301 | 254 | 197 | 103 | 26 |
| LLV | 110 | 89  | 70  | 52  | 28  | 5  |

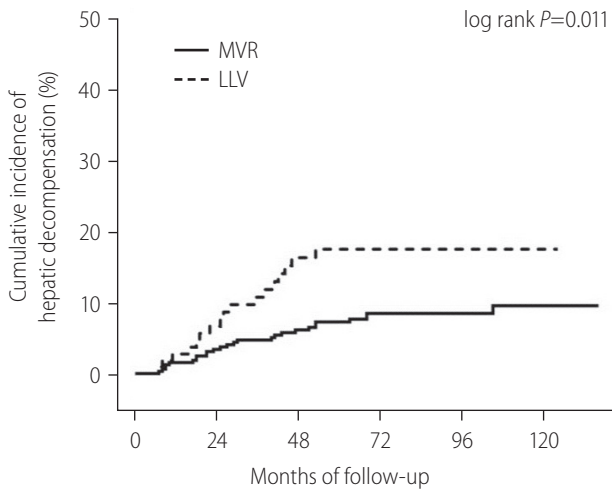

Number at risk

**C**

|     |     |     |     |     |     |    |
|-----|-----|-----|-----|-----|-----|----|
| MVR | 330 | 301 | 259 | 208 | 110 | 30 |
| LLV | 110 | 93  | 71  | 54  | 31  | 5  |

**Supplementary Figure 3.** Cumulative incidence of liver-related death or transplantation, HCC, and hepatic decompensation in cirrhotic subcohort (n=440). (A) Cumulative incidence of liver-related death or transplantation according to MVR vs. LLV. (B) Cumulative incidence of HCC according to MVR vs. LLV. (C) Cumulative incidence of hepatic decompensation according to MVR vs. LLV. MVR, maintained virologic response; LLV, low-level viremia; HCC, hepatocellular carcinoma.
